# Supplementary material
Source: PubMed Central journal article supplement (PMC5881055)
Supplement: AEM.00049-18_zam008188436s1.pdf [file AEM.00049-18_zam008188436s1.pdf]

**PccD regulates branched-chain amino acid degradation, and  
exerts a negative effect on erythromycin production in  
*Saccharopolyspora erythraea***

Zhen Xu<sup>1</sup>, Yong Liu<sup>1</sup>, and Bang-Ce Ye<sup>1,2\*</sup>

<sup>1</sup>Lab of Biosystems and Microanalysis, State Key Laboratory of Bioreactor Engineering, East China  
University of Science and Technology, Shanghai 200237, China

<sup>2</sup>Collaborative Innovation Center of Yangtze River Delta Region Green Pharmaceuticals, College of  
Pharmaceutical Sciences, Zhejiang University of Technology, Hangzhou 310014, Zhejiang, China

**Supplemental Materials**

**Table S1.** Predicted PccD-binding genes in *S. erythraea*

| Name      | Function                                               | p-value  | PccD box        | pos  |
|-----------|--------------------------------------------------------|----------|-----------------|------|
| SACE_3400 | acetyl/propionyl-CoA carboxylase alpha subunit         | 1.39E-08 | ATGACGGTGTGGT   | 80   |
| SACE_1905 | alcohol dehydrogenase, zinc-binding domain protein     | 1.64E-07 | ATGTCGGTGGTGT   | 179  |
| SACE_7326 | twin-arginine translocation pathway signal             | 2.38E-07 | ATGACGGTGCAGT   | -105 |
| SACE_4036 | putative para-aminobenzoic acid synthase               | 4.14E-07 | ATGACGATGTTGT   | -39  |
| SACE_1233 | Putative 2-hydroxyhepta-2,4-diene-1,7-dioate isomerase | 4.14E-07 | ATGTCGGTGGTGA   | 59   |
| SACE_2882 | possible transcriptional regulator, ArsR family        | 6.22E-07 | ATGGCGGTGTTGT   | 59   |
| SACE_2881 | flavodoxin/nitric oxide synthase                       | 6.22E-07 | ATGGCGGTGTTGT   | 1    |
| SACE_0073 | probable copper resistance protein                     | 6.22E-07 | ATGACGCTGATGT   | -57  |
| SACE_0057 | monooxygenase, FAD-binding                             | 6.22E-07 | ATGACGCTGATGT   | -10  |
| SACE_6922 | hypothetical protein                                   | 7.34E-07 | ATGACGGTGCCTGG  | -52  |
| SACE_3897 | putative S-adenosyl-L-homocysteine hydrolase           | 7.34E-07 | ATGACGGTGCAGA   | 179  |
| SACE_3880 | aldehyde dehydrogenase                                 | 7.34E-07 | ATGTCGGTGGAGT   | 83   |
| SACE_2890 | LuxR-family transcriptional regulator                  | 7.34E-07 | ATGACGGTGCAGA   | 0    |
| SACE_5879 | hypothetical protein                                   | 8.28E-07 | ATGACCGTGTGGT   | 53   |
| SACE_3143 | aromatic acid symporter, MFS superfamily               | 8.28E-07 | ATGACGGTGCCTGT  | 77   |
| SACE_0174 | transcriptional regulator, PadR-like family            | 9.75E-07 | ATGACGGTTTTGT   | 116  |
| SACE_0173 | putative dioxygenase                                   | 9.75E-07 | ATGACGGTTTTGT   | 134  |
| SACE_3223 | transcriptional regulator, TetR family                 | 1.20E-06 | ATGTCGCTGCTGA   | 43   |
| SACE_7025 | hypothetical protein                                   | 1.34E-06 | ATCACGGTGGTGT   | -129 |
| SACE_1196 | probable ATP-dependent DNA helicase-related protein    | 1.34E-06 | ATGACGGTGGTCT   | -73  |
| SACE_0568 | MoaD2                                                  | 1.54E-06 | ATGACGGCGGTGT   | 184  |
| SACE_6541 | cation antiporter                                      | 2.04E-06 | CTGACGCTGGTGT   | 181  |
| SACE_3915 | NAD-dependent epimerase/dehydratase                    | 2.04E-06 | ATGACGCTGCCGT   | 119  |
| SACE_3497 | probable transcriptional regulator, MarR family        | 2.04E-06 | ATGACGGTGGTGC   | 40   |
| SACE_1094 | hypothetical protein                                   | 2.04E-06 | ATGACCCGTGTTGT  | 155  |
| SACE_0312 | GatB/YqeY, uncharacterized protein                     | 2.29E-06 | GTGACGGTGTGGT   | 196  |
| SACE_3562 | formate dehydrogenase alpha subunit                    | 2.48E-06 | ATGACGATGCAGT   | -115 |
| SACE_7013 | hypothetical protein                                   | 2.91E-06 | AAGACGGTGCCTGT  | 64   |
| SACE_5095 | site-specific recombinase, phage integrase family      | 2.91E-06 | TTGACGCTGGTGA   | 25   |
| SACE_6914 | naphthoate synthase                                    | 3.20E-06 | ATGTCGGTGAAGT   | 106  |
| SACE_6895 | NADH dehydrogenase I chain H                           | 3.20E-06 | ATGACGCTGTTCT   | -5   |
| SACE_3722 | terpene synthase, metal-binding                        | 3.20E-06 | ACGACGGTGCCTGT  | 184  |
| SACE_3397 | hypothetical protein                                   | 3.20E-06 | TTGACGCTGCTGA   | 152  |
| SACE_1503 | hypothetical protein                                   | 3.20E-06 | TTGTCGGTGTGGTGA | 140  |
| SACE_3042 | dicarboxylate carrier protein                          | 3.75E-06 | ATCACGCTGCTGT   | -112 |
| SACE_5642 | hypothetical protein                                   | 4.44E-06 | ATGTCGTTGGTGT   | -303 |
| SACE_0222 | hypothetical protein                                   | 4.91E-06 | ATGAGGGTGTAGT   | -8   |
| SACE_1082 | hypothetical protein                                   | 5.93E-06 | ATATCGGTGTGGT   | 1    |
| SACE_1277 | peptide/nickel transport system ATP-binding protein    | 8.93E-06 | ATGACCGTGCCTGG  | 31   |
| SACE_1638 | dihydrolipoamide succinyltransferase                   | 1.09E-05 | TTGTCGGTGGAGA   | 88   |
| SACE_2228 | probable multidrug resistance transporter              | 1.54E-05 | CTGACGCTGGTGG   | 14   |
| SACE_1550 | LamB/YcsF, UPF0271 protein                             | 2.25E-05 | TTGGCGCTGGTGA   | 1    |
| SACE_7008 | hypothetical protein                                   | 2.40E-05 | ATGACGACGGTGA   | -170 |
| SACE_4063 | metabolite transporter, MFS superfamily                | 2.58E-05 | ATGACGGTGTGTT   | 25   |
| SACE_0951 | protein of unknown function DUF195                     | 2.78E-05 | CTGTCGGTGGGGT   | -10  |
| SACE_3318 | possible esterase                                      | 5.53E-05 | ATGTTGGGTGTCTGA | -11  |

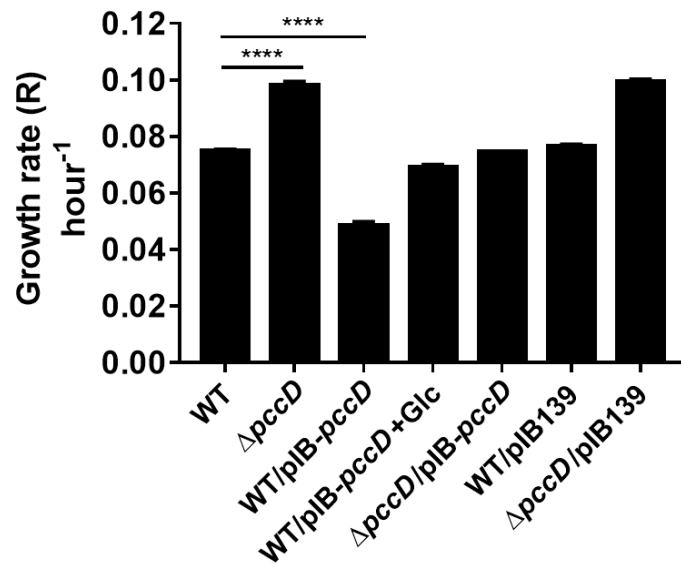

**Figure S1.** Growth rates of *S. erythraea* wide type strains (WT), *pccD* deletion strains ( $\Delta pccD$ ), *pccD* complementation strain ( $\Delta pccD/pIB-pccD$ ), and *pccD* overexpression strains (WT/pIB-*pccD*) grown with basic Evans medium with 30 mM valine and the growth rate of WT/pIB-*pccD* grown with basic Evans medium with 30 mM valine plus 140 mM glucose. \*\*\*\*P<0.0001.

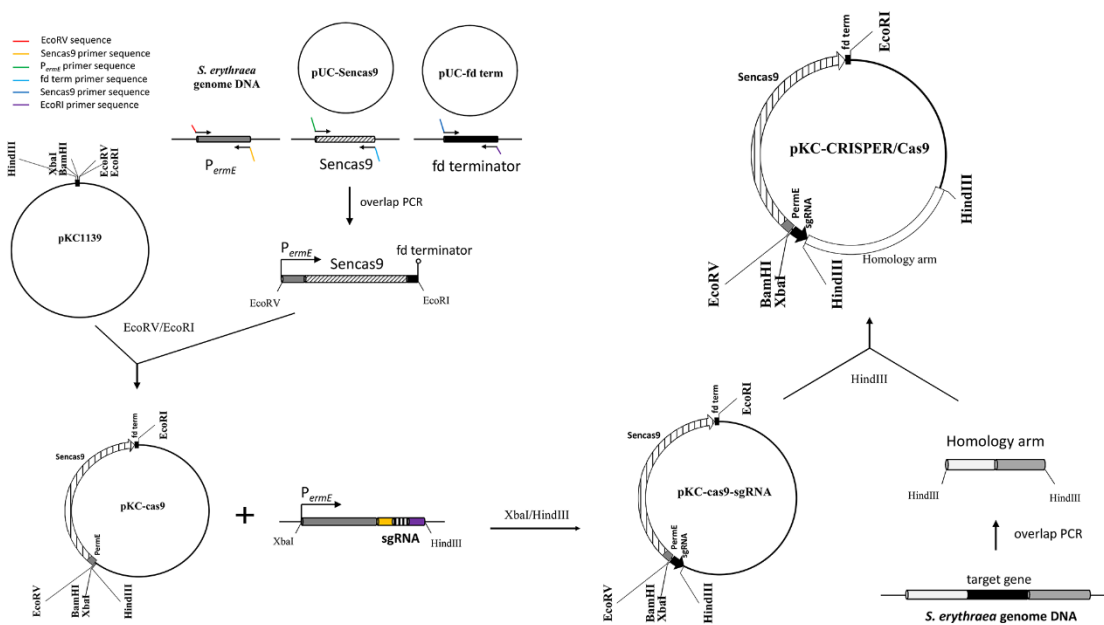

Figure S2. Flowchart for pKC-CRISPR/Cas9 construction.

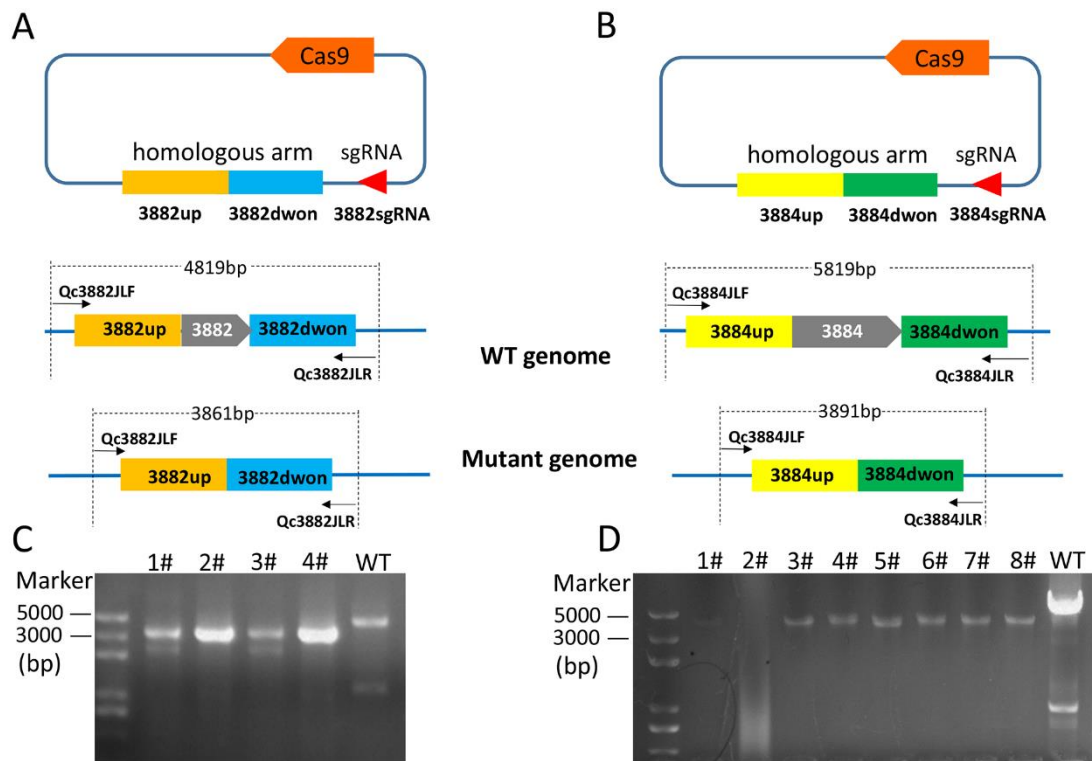

**Figure S3.** Identification of *gdhA1*-deleted and *bcdhE1*-deleted mutant. **A** and **B**. Strategy of CRISPR/Cas9-mediated deletion of *gdhA1* (SACE\_3882) and *bcdhE1* (SACE\_3884). **C** and **D**. PCR screening of *gdhA1*-deleted and *bcdhE1*-deleted mutants using primer Qc3882JLF/R and Qc3884JLF/R.

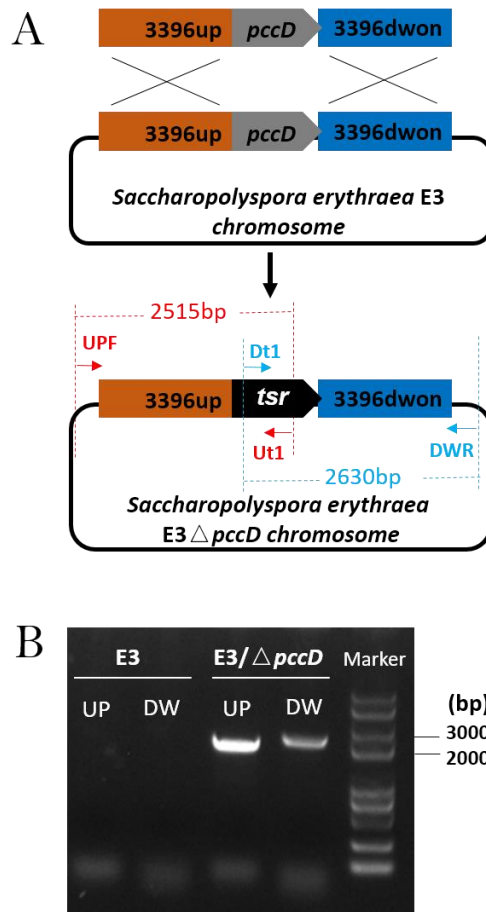

**Figure S4. Identification of *S. erythraea* E3 $\Delta$ *pccD*.**

**A.** Strategy of double crossover gene knock-out method for *pccD* (SACE\_3396).

**B.** PCR screening of double-exchanged clones using primer UPF/Ut1 and primer Dt1/DWR.
